# Supplementary material for: Investigation of Weather Triggers Preceding Outbreaks of Acute Bovine Liver Disease in Australia
Source: MDPI journal article supplement (doi:10.3390/toxins14060414), 2022-06-17
Supplement: s1 [file s1]

# Investigation of Weather Triggers Preceding Outbreaks of Acute Bovine Liver Disease in Australia

Eve M. Manthorpe, Grant T. Rawlin, Mark A. Stevenson, Lucy Woolford and Charles G. B. Caraguel

**Table S1.** Weather dataset for the 15-days preceding an outbreak of acute bovine liver disease in the outbreak year (0) and two preceding years (-1, -2) when no outbreak occurred, inclusive of property and outbreak identification, and outbreak date. Abbreviations: avg, average; cum, cumulative; DP, dewpoint (degrees Celsius; °C); OID, outbreak identification; Odate, outbreak date; PID, property identification; prec, precipitation (millimetres; mm); sol, solar exposure (Joule(s) per square metre; MJ/m<sup>2</sup>); Tmax, maximum temperature (degrees Celsius; °C); Tmin, minimum temperature (degrees Celsius; °C); Tmin-DP, average of daily minimum and dewpoint at 9am temperature gap (degrees Celsius; °C).

| PID | OID | Odate     | Case | Year | Tmin (avg) | Tmax (avg) | Prec (avg) | Prec (cum) | Sol (avg) | Sol (cum) | DP 0900 (avg) | DP 1500 (avg) | Tmin-DP | Tmax-DP |
|-----|-----|-----------|------|------|------------|------------|------------|------------|-----------|-----------|---------------|---------------|---------|---------|
| A   | 1   | 20/2/2008 | 1    | 0    | 8.55       | 20.46      | 0.49       | 7.42       | 12.03     | 180.49    | 10.69         | 9.71          | -2.14   | 10.75   |
| A   | 1   | 20/2/2008 | 0    | -1   | 9.63       | 22.82      | 0.08       | 1.25       | 12.97     | 194.57    | 9.77          | 8.82          | -0.14   | 14.00   |
| A   | 1   | 20/2/2008 | 0    | -2   | 8.71       | 17.29      | 1.96       | 29.41      | 9.56      | 133.90    | 8.17          | 7.57          | 0.54    | 9.72    |
| B   | 2   | 17/5/2017 | 1    | 0    | 9.49       | 18.02      | 0.73       | 10.96      | 8.23      | 123.42    | 10.10         | 10.26         | -0.61   | 7.76    |
| B   | 2   | 17/5/2017 | 0    | -1   | 11.45      | 19.13      | 1.45       | 21.70      | 7.18      | 107.67    | 11.70         | 12.10         | -0.25   | 7.02    |
| B   | 2   | 17/5/2017 | 0    | -2   | 8.86       | 15.65      | 3.27       | 49.03      | 6.60      | 92.39     | 9.24          | 9.58          | -0.38   | 6.07    |
| C   | 3   | 31/3/2010 | 1    | 0    | 13.06      | 23.71      | 1.09       | 16.35      | 12.66     | 189.93    | 12.83         | 13.09         | 0.23    | 10.62   |
| C   | 3   | 31/3/2010 | 0    | -1   | 10.21      | 23.21      | 0.54       | 8.09       | 15.80     | 236.98    | 10.34         | 9.65          | -0.13   | 13.56   |
| C   | 3   | 31/3/2010 | 0    | -2   | 11.34      | 23.95      | 1.63       | 24.51      | 14.42     | 216.32    | 10.08         | 9.45          | 1.26    | 14.51   |
| D   | 4   | 1/4/2010  | 1    | 0    | 13.43      | 24.33      | 1.66       | 24.97      | 12.60     | 189.06    | 13.48         | 13.42         | -0.06   | 10.91   |
| D   | 4   | 1/4/2010  | 0    | -1   | 11.87      | 23.42      | 4.23       | 63.40      | 17.05     | 255.82    | 13.24         | 12.71         | -1.38   | 10.71   |
| D   | 4   | 1/4/2010  | 0    | -2   | 12.72      | 23.18      | 1.66       | 24.97      | 13.61     | 204.14    | 12.67         | 13.04         | 0.04    | 10.14   |
| E   | 5   | 20/4/2010 | 1    | 0    | 12.37      | 19.82      | 2.25       | 33.79      | 8.60      | 128.95    | 12.08         | 12.49         | 0.29    | 7.33    |
| E   | 5   | 20/4/2010 | 0    | -1   | 8.92       | 18.90      | 1.26       | 18.85      | 12.01     | 180.22    | 10.55         | 10.10         | -1.62   | 8.80    |
| E   | 5   | 20/4/2010 | 0    | -2   | 9.22       | 20.56      | 0.59       | 8.91       | 12.43     | 186.44    | 11.11         | 10.38         | -1.90   | 10.19   |
| E   | 6   | 20/4/2010 | 1    | 0    | 13.05      | 20.27      | 2.24       | 33.58      | 8.56      | 128.40    | 12.33         | 12.81         | 0.73    | 7.46    |
| E   | 6   | 20/4/2010 | 0    | -1   | 9.73       | 19.27      | 1.31       | 19.67      | 12.19     | 182.87    | 10.84         | 10.47         | -1.12   | 8.80    |
| E   | 6   | 20/4/2010 | 0    | -2   | 9.99       | 20.96      | 0.64       | 9.61       | 12.62     | 189.29    | 11.40         | 10.79         | -1.41   | 10.17   |
| F   | 7   | 23/4/2010 | 1    | 0    | 12.03      | 20.39      | 1.65       | 24.74      | 8.91      | 133.67    | 12.37         | 12.61         | -0.34   | 7.79    |
| F   | 7   | 23/4/2010 | 0    | -1   | 8.14       | 20.62      | 0.82       | 12.31      | 13.10     | 196.52    | 10.19         | 9.51          | -2.06   | 11.12   |
| F   | 7   | 23/4/2010 | 0    | -2   | 8.44       | 20.95      | 0.22       | 3.24       | 11.75     | 176.31    | 10.61         | 9.67          | -2.17   | 11.28   |
| G   | 8   | 10/3/2011 | 1    | 0    | 12.98      | 21.44      | 1.15       | 17.28      | 17.01     | 255.15    | 11.45         | 12.92         | 1.53    | 8.52    |
| G   | 8   | 10/3/2011 | 0    | -1   | 13.30      | 22.40      | 2.16       | 32.38      | 17.79     | 266.89    | 12.25         | 12.80         | 1.05    | 9.61    |
| G   | 8   | 10/3/2011 | 0    | -2   | 12.03      | 22.66      | 0.85       | 12.78      | 17.23     | 258.45    | 10.66         | 11.28         | 1.37    | 11.38   |

|   |    |            |   |    |       |       |      |        |       |        |       |       |       |       |
|---|----|------------|---|----|-------|-------|------|--------|-------|--------|-------|-------|-------|-------|
| H | 9  | 26/4/2011  | 1 | 0  | 9.73  | 18.08 | 5.61 | 84.14  | 10.25 | 153.69 | 11.75 | 12.08 | -2.01 | 6.00  |
| H | 9  | 26/4/2011  | 0 | -1 | 13.01 | 20.37 | 2.13 | 31.91  | 9.27  | 139.00 | 12.14 | 12.59 | 0.87  | 7.78  |
| H | 9  | 26/4/2011  | 0 | -2 | 9.74  | 20.62 | 2.15 | 32.21  | 11.53 | 173.02 | 10.42 | 10.42 | -0.68 | 10.20 |
| I | 10 | 21/5/2013  | 1 | 0  | 8.86  | 19.62 | 1.55 | 23.30  | 9.94  | 149.17 | 8.79  | 7.46  | 0.07  | 12.16 |
| I | 10 | 21/5/2013  | 0 | -1 | 8.59  | 17.67 | 1.88 | 28.26  | 8.33  | 124.99 | 8.83  | 8.67  | -0.24 | 9.00  |
| I | 10 | 21/5/2013  | 0 | -2 | 8.22  | 15.30 | 2.67 | 40.01  | 6.41  | 96.09  | 7.62  | 7.83  | 0.60  | 7.47  |
| J | 11 | 9/6/2013   | 1 | 0  | 8.19  | 15.72 | 2.17 | 32.61  | 5.88  | 88.14  | 9.40  | 9.72  | -1.21 | 6.00  |
| J | 11 | 9/6/2013   | 0 | -1 | 7.03  | 13.77 | 3.11 | 46.63  | 5.25  | 78.79  | 8.11  | 8.61  | -1.08 | 5.15  |
| J | 11 | 9/6/2013   | 0 | -2 | 5.66  | 13.88 | 1.69 | 25.30  | 5.97  | 89.50  | 7.07  | 7.54  | -1.41 | 6.34  |
| J | 12 | 6/7/2013   | 1 | 0  | 5.46  | 14.49 | 0.97 | 14.49  | 6.18  | 92.74  | 6.88  | 8.16  | -1.42 | 6.33  |
| J | 12 | 6/7/2013   | 0 | -1 | 5.40  | 12.05 | 3.09 | 46.29  | 5.57  | 83.59  | 6.52  | 7.15  | -1.12 | 4.90  |
| J | 12 | 6/7/2013   | 0 | -2 | 6.17  | 14.20 | 3.22 | 48.37  | 5.86  | 87.84  | 6.72  | 8.06  | -0.54 | 6.14  |
| K | 13 | 19/4/2014  | 1 | 0  | 8.08  | 16.70 | 9.57 | 143.60 | 9.04  | 135.65 | 10.01 | 10.56 | -1.93 | 6.15  |
| K | 13 | 19/4/2014  | 0 | -1 | 7.72  | 19.07 | 1.13 | 16.99  | 11.98 | 179.69 | 9.22  | 9.85  | -1.48 | 9.23  |
| K | 13 | 19/4/2014  | 0 | -2 | 6.85  | 18.66 | 0.72 | 10.74  | 14.60 | 219.04 | 8.56  | 9.24  | -1.36 | 9.42  |
| L | 14 | 24/4/2014  | 1 | 0  | 10.49 | 19.56 | 2.57 | 38.50  | 9.55  | 143.25 | 12.19 | 11.28 | -1.71 | 8.27  |
| L | 14 | 24/4/2014  | 0 | -1 | 8.59  | 20.43 | 0.57 | 8.50   | 10.97 | 164.48 | 10.21 | 8.24  | -1.61 | 12.19 |
| L | 14 | 24/4/2014  | 0 | -2 | 10.08 | 21.88 | 0.89 | 13.31  | 12.42 | 186.29 | 10.92 | 9.32  | -0.80 | 12.71 |
| M | 15 | 25/4/2014  | 1 | 0  | 11.13 | 17.96 | 2.62 | 39.28  | 10.46 | 156.90 | 11.74 | 11.08 | -0.61 | 6.89  |
| M | 15 | 25/4/2014  | 0 | -1 | 9.80  | 18.41 | 1.03 | 15.48  | 9.77  | 146.61 | 9.94  | 8.99  | -0.14 | 9.42  |
| M | 15 | 25/4/2014  | 0 | -2 | 11.11 | 20.01 | 2.44 | 36.60  | 11.30 | 169.52 | 11.36 | 10.41 | -0.20 | 9.61  |
| N | 16 | 4/6/2014   | 1 | 0  | 8.98  | 17.34 | 2.04 | 30.54  | 5.82  | 87.33  | 11.28 | 11.87 | -2.30 | 5.48  |
| N | 16 | 4/6/2014   | 0 | -1 | 7.19  | 15.90 | 1.85 | 27.78  | 5.91  | 88.71  | 9.08  | 9.61  | -1.89 | 6.29  |
| N | 16 | 4/6/2014   | 0 | -2 | 6.76  | 14.70 | 2.57 | 38.60  | 5.91  | 88.61  | 7.99  | 8.19  | -1.23 | 6.50  |
| O | 17 | 20/4/2015  | 1 | 0  | 9.92  | 19.23 | 1.81 | 27.16  | 11.46 | 171.90 | 11.65 | 11.02 | -1.73 | 8.21  |
| O | 17 | 20/4/2015  | 0 | -1 | 12.53 | 20.26 | 2.18 | 32.68  | 10.75 | 161.22 | 13.41 | 13.15 | -0.87 | 7.11  |
| O | 17 | 20/4/2015  | 0 | -2 | 10.61 | 20.39 | 0.78 | 11.70  | 12.12 | 181.80 | 11.93 | 11.85 | -1.52 | 8.54  |
| P | 18 | 23/11/2017 | 1 | 0  | 10.62 | 24.75 | 0.35 | 5.26   | 24.95 | 374.18 | 13.00 | 12.43 | -2.39 | 12.33 |
| P | 18 | 23/11/2017 | 0 | -1 | 9.90  | 20.73 | 1.64 | 24.56  | 19.67 | 295.04 | 10.68 | 10.89 | -0.78 | 9.84  |
| P | 18 | 23/11/2017 | 0 | -2 | 9.20  | 22.15 | 1.59 | 23.82  | 20.60 | 309.01 | 10.93 | 10.99 | -1.72 | 11.16 |
| Q | 19 | 21/4/2018  | 1 | 0  | 10.43 | 22.47 | 1.78 | 26.67  | 11.07 | 166.06 | 10.94 | 10.12 | -0.52 | 12.35 |
| Q | 19 | 21/4/2018  | 0 | -1 | 9.58  | 20.49 | 1.81 | 27.20  | 10.16 | 152.35 | 9.81  | 10.14 | -0.23 | 10.36 |
| Q | 19 | 21/4/2018  | 0 | -2 | 10.00 | 20.27 | 1.45 | 21.72  | 10.80 | 161.98 | 11.15 | 10.60 | -1.16 | 9.67  |
| R | 20 | 21/5/2018  | 1 | 0  | 7.61  | 14.97 | 4.33 | 64.96  | 6.81  | 102.14 | 9.11  | 8.42  | -1.50 | 6.55  |
| R | 20 | 21/5/2018  | 0 | -1 | 5.60  | 15.58 | 1.20 | 18.02  | 7.42  | 111.30 | 8.73  | 9.34  | -3.13 | 6.24  |
| R | 20 | 21/5/2018  | 0 | -2 | 10.19 | 18.01 | 4.47 | 67.05  | 7.40  | 111.02 | 11.06 | 10.84 | -0.87 | 7.17  |
| S | 21 | 21/5/2018  | 1 | 0  | 7.61  | 14.97 | 4.33 | 64.96  | 6.81  | 102.14 | 9.11  | 8.42  | -1.50 | 6.55  |
| S | 21 | 21/5/2018  | 0 | -1 | 5.60  | 15.58 | 1.20 | 18.02  | 7.42  | 111.30 | 8.73  | 9.34  | -3.13 | 6.24  |
| S | 21 | 21/5/2018  | 0 | -2 | 10.19 | 18.01 | 4.47 | 67.05  | 7.40  | 111.02 | 11.06 | 10.84 | -0.87 | 7.17  |
| T | 22 | 26/9/2018  | 1 | 0  | 4.55  | 16.31 | 1.06 | 15.83  | 15.20 | 227.97 | 5.45  | 4.92  | -0.90 | 11.38 |
| T | 22 | 26/9/2018  | 0 | -1 | 5.91  | 17.15 | 3.08 | 46.21  | 15.42 | 231.27 | 7.04  | 6.74  | -1.13 | 10.42 |
| T | 22 | 26/9/2018  | 0 | -2 | 7.00  | 15.28 | 1.40 | 20.94  | 12.70 | 190.48 | 8.20  | 7.82  | -1.20 | 7.46  |

|   |    |           |   |    |       |       |      |       |       |        |       |       |       |       |
|---|----|-----------|---|----|-------|-------|------|-------|-------|--------|-------|-------|-------|-------|
| U | 23 | 15/4/2019 | 1 | 0  | 9.38  | 21.64 | 0.85 | 12.71 | 12.52 | 187.76 | 10.20 | 10.10 | -0.83 | 11.54 |
| U | 23 | 15/4/2019 | 0 | -1 | 11.56 | 25.54 | 0.11 | 1.67  | 13.45 | 201.70 | 11.43 | 10.67 | 0.13  | 14.87 |
| U | 23 | 15/4/2019 | 0 | -2 | 8.63  | 21.40 | 4.95 | 74.22 | 12.10 | 181.48 | 10.01 | 9.33  | -1.38 | 12.07 |
| V | 24 | 4/5/2019  | 1 | 0  | 9.04  | 21.72 | 6.57 | 98.50 | 11.31 | 169.59 | 10.57 | 10.27 | -1.54 | 11.44 |
| V | 24 | 4/5/2019  | 0 | -1 | 7.66  | 23.05 | 0.20 | 3.03  | 12.59 | 188.90 | 8.51  | 8.06  | -0.85 | 14.99 |
| V | 24 | 4/5/2019  | 0 | -2 | 7.49  | 18.67 | 3.91 | 58.58 | 9.99  | 149.88 | 9.59  | 9.55  | -2.10 | 9.12  |
| U | 25 | 5/7/2019  | 1 | 0  | 3.38  | 15.46 | 0.28 | 4.25  | 8.38  | 125.69 | 4.22  | 5.31  | -0.84 | 10.16 |
| U | 25 | 5/7/2019  | 0 | -1 | 2.69  | 14.60 | 0.17 | 2.61  | 7.80  | 117.04 | 3.12  | 5.22  | -0.43 | 9.37  |
| U | 25 | 5/7/2019  | 0 | -2 | 3.06  | 14.53 | 0.33 | 4.98  | 7.54  | 113.06 | 3.87  | 4.76  | -0.80 | 9.76  |
| W | 26 | 20/4/2020 | 1 | 0  | 9.34  | 18.17 | 2.10 | 31.51 | 10.24 | 153.65 | 10.37 | 9.29  | -1.04 | 8.88  |
| W | 26 | 20/4/2020 | 0 | -1 | 10.06 | 22.30 | 0.58 | 8.73  | 11.56 | 173.46 | 9.67  | 8.04  | 0.38  | 14.26 |
| W | 26 | 20/4/2020 | 0 | -2 | 10.39 | 22.49 | 1.67 | 25.01 | 10.59 | 158.84 | 10.98 | 9.20  | -0.59 | 13.29 |

**Table S2.** Correlation matrix across the weather parameters summarised over a 15-day prior the report of an acute bovine liver disease event or the same calendar date the one or two years prior. Reported estimates are pairwise Pearson's correlation coefficient ( $r$ , ranging between -1 and +1).

Abbreviations: avg, average; cum, cumulative; DP, dewpoint (degrees Celsius; °C); OID, outbreak identification; Odate, outbreak date; PID, property identification; prec, precipitation (millimetres; mm); RH, relative humidity (per cent; %); sol. exp, solar exposure (Joule(s) per square metre; MJ/m<sup>2</sup>); Tav, average temperature (degrees Celsius; °C); Tgap, average temperature gap (Tmax-Tmin); Tmax, maximum temperature (degrees Celsius; °C); Tmin, minimum temperature (degrees Celsius; °C); Tmin-DP, average of daily minimum and dewpoint at 9am temperature gap (degrees Celsius; °C); vap. press, vapour pressure (hectopascals; hPa).

|                                            | <i>Avg. daily <math>T_{min}</math></i> | <i>Avg. daily <math>T_{max}</math></i> | <i>Avg. daily <math>T_{avg}</math></i> | <i>Avg. daily <math>T_{gap}</math></i> | <i>Avg. daily vap. press<sub>3pm</sub></i> | <i>Cum. daily prec.</i> | <i>Avg. daily sol. exp</i> | <i>Cum. daily sol. exp</i> | <i>Avg. daily RH<sub>9am</sub></i> | <i>Avg. daily RH<sub>3pm</sub></i> | <i>Avg. DP<sub>9am</sub></i> | <i>Avg. DP<sub>3pm</sub></i> | <i>Avg. min. to 9am DP<sub>gap</sub></i> | <i>Avg. max. to 3pm DP<sub>gap</sub></i> |
|--------------------------------------------|----------------------------------------|----------------------------------------|----------------------------------------|----------------------------------------|--------------------------------------------|-------------------------|----------------------------|----------------------------|------------------------------------|------------------------------------|------------------------------|------------------------------|------------------------------------------|------------------------------------------|
| <i>Avg. daily <math>T_{min}</math></i>     | -                                      |                                        |                                        |                                        |                                            |                         |                            |                            |                                    |                                    |                              |                              |                                          |                                          |
| <i>Avg. daily <math>T_{max}</math></i>     | 0.7380*                                | -                                      |                                        |                                        |                                            |                         |                            |                            |                                    |                                    |                              |                              |                                          |                                          |
| <i>Avg. daily <math>T_{avg}</math></i>     | 0.9144*                                | 0.9480*                                | -                                      |                                        |                                            |                         |                            |                            |                                    |                                    |                              |                              |                                          |                                          |
| <i>Avg. daily <math>T_{gap}</math></i>     | -0.0723                                | 0.6197*                                | 0.3376*                                | -                                      |                                            |                         |                            |                            |                                    |                                    |                              |                              |                                          |                                          |
| <i>Avg. daily vap. press<sub>3pm</sub></i> | 0.8756*                                | 0.5836*                                | 0.7632*                                | -0.1558                                | -                                          |                         |                            |                            |                                    |                                    |                              |                              |                                          |                                          |
| <i>Cum. daily prec.</i>                    | 0.0295                                 | -0.2479*                               | -0.1346                                | -0.4004*                               | 0.1319                                     | -                       |                            |                            |                                    |                                    |                              |                              |                                          |                                          |
| <i>Avg. daily sol. exp</i>                 | 0.3837*                                | 0.7174*                                | 0.6114*                                | 0.6143*                                | 0.3275*                                    | -0.2576*                | -                          |                            |                                    |                                    |                              |                              |                                          |                                          |
| <i>Cum. daily sol. exp</i>                 | 0.3832*                                | 0.7185*                                | 0.6118*                                | 0.6165*                                | 0.3293*                                    | -0.2582*                | 0.9997*                    | -                          |                                    |                                    |                              |                              |                                          |                                          |
| <i>Avg. daily RH<sub>9am</sub></i>         | -0.4764*                               | -0.2708*                               | -0.3873*                               | 0.154                                  | -0.1817                                    | 0.1098                  | -0.0869                    | -0.0827                    | -                                  |                                    |                              |                              |                                          |                                          |
| <i>Avg. daily RH<sub>3pm</sub></i>         | -0.5994*                               | -0.5304*                               | -0.6008*                               | -0.0868                                | -0.1574                                    | 0.1427                  | -0.2540*                   | -0.2500*                   | 0.7299*                            | -                                  |                              |                              |                                          |                                          |
| <i>Avg. DP<sub>9am</sub></i>               | 0.9165*                                | 0.7024*                                | 0.8537*                                | -0.0276                                | 0.9201*                                    | 0.1022                  | 0.3832*                    | 0.3845*                    | -0.0901                            | -0.3310*                           | -                            |                              |                                          |                                          |
| <i>Avg. DP<sub>3pm</sub></i>               | 0.8725*                                | 0.5810*                                | 0.7602*                                | -0.1561                                | 0.9958*                                    | 0.1393                  | 0.3135*                    | 0.3154*                    | -0.1481                            | -0.137                             | 0.9326*                      | -                            |                                          |                                          |
| <i>Avg. min. to 9am DP<sub>gap</sub></i>   | 0.4882*                                | 0.3055*                                | 0.4136*                                | -0.1166                                | 0.1728                                     | -0.1509                 | 0.124                      | 0.1199                     | -0.9892*                           | -0.7521*                           | 0.0988                       | 0.1375                       | -                                        |                                          |
| <i>Avg. max. to 3pm DP<sub>gap</sub></i>   | 0.2164                                 | 0.7670*                                | 0.5621*                                | 0.8819*                                | -0.07                                      | -0.4135*                | 0.6316*                    | 0.6316*                    | -0.2144                            | -0.5417*                           | 0.1257                       | -0.0765                      | 0.2655*                                  | -                                        |

Correlation estimates with a star (\*) were significantly different from  $r = 0.00$  at the 5% significance level. Strong ( $r \geq 0.67$ ) significant ( $P < 0.05$ ) positive ( $r > 0.00$ ) correlations are reported in green, mild to moderate ( $0 > r < 0.67$ ) significant ( $P < 0.05$ ) positive ( $r > 0.00$ ) correlations in clear green, strong ( $r \leq -0.67$ ) significant ( $P < 0.05$ ) negative ( $r < 0.00$ ) correlations are reported in dark red, mild to moderate ( $-0.67 > r < 0$ ) significant ( $P < 0.05$ ) negative ( $r < 0.00$ ) correlations in weak orange, and non-significant correlation ( $P > 0.05$ ) correlation in gray.
